# Supplementary material
Source: PubMed Central journal article supplement (PMC11321072)
Supplement: btae493_supplementary_data.pdf [file btae493_supplementary_data.pdf]

## Supplemental Material

---

### Algorithm 1 Partition Sequence S into sets of modimizers

---

**Input:** List of hashed  $k$ -mers  $S_k[x_1, x_2, \dots, x_n]$ , window size  $w$ , sparsity  $s$   
**Output:** List of modimizer sets  $MOD_s = [A_1, A_2, \dots, A_r]$

```

1: function BASELAYER( $S_k, w, s$ )
2:    $n \leftarrow$  length of  $S_k$ 
3:    $r \leftarrow \lceil \frac{n}{w} \rceil$  ▷ Set number of windows (resolution) based on  $n$  and  $w$ 
4:    $m \leftarrow \frac{w}{s}$  ▷ Set the expected modimizer density
5:    $MOD_s \leftarrow$  list of size  $r$ 
6:   for  $i \leftarrow 0$  to  $r$  do ▷ Retrieve all modimizers within each interval
7:      $MOD_s[i] \leftarrow \{\}$ 
8:      $start \leftarrow wi$  ▷ Set non-overlapping interval boundaries
9:      $end \leftarrow \min((start + w), n - 1)$ 
10:     $MOD_s[i] \leftarrow$  GETMODIMIZERS( $S_k[start : end], s, d$ ) ▷ Populate list with sets of modimizers
11:  end for
12:  return  $MOD_s$ 
13: end function

14: function GETMODIMIZERS( $S_k, s, m$ )
15:    $A \leftarrow \forall x \in \{S_k[A] : x \equiv 0 \pmod{s}\}$  ▷ Gather the set of unique modimizers per interval
16:    $\hat{s} \leftarrow \frac{s}{2}$ 
17:   while  $|A| < \frac{m}{2}$  and  $\hat{s} > 1$  do ▷ Resample at higher density if number of modimizers is under threshold
18:      $A \leftarrow \forall x \in \{S_k[A] : x \equiv 0 \pmod{\hat{s}}\}$ 
19:      $\hat{s} \leftarrow \frac{\hat{s}}{2}$ 
20:  end while
21:  return  $A$ 
22: end function

```

---

### Algorithm 2 Partition Sequence S into a modimizer hierarchy H

---

**Input:** List of hashed  $k$ -mers  $S_k[x_1, x_2, \dots, x_n]$ , minimum window size  $\hat{w}$ , sparsity  $\hat{s}$ , resolution  $r$   
**Output:** List  $H = [MOD_{\hat{s}}, MOD_{2\hat{s}}, \dots, MOD_{2^{l-1}\hat{s}}]$

```

1: function BUILDHIERARCHY( $S_k, \hat{w}, \hat{s}, r$ )
2:    $n \leftarrow$  length of  $S_k$ 
3:    $l \leftarrow \lfloor \log_2(\frac{n}{\hat{w}r}) \rfloor$  ▷ Initialize number of layers based on min. window size and resolution
4:    $H \leftarrow$  list of size  $l$ 
5:    $H[0] \leftarrow$  BASELAYER( $S_k, \hat{w}, \hat{s}$ ) ▷ Compute bottom layer
6:   for  $i \leftarrow 1$  to  $l$  do ▷ Iteratively compute subsequent layers from previous layer
7:      $\hat{r} \leftarrow 2^{l-1-i}r$  ▷ Halve the resolution when building subsequent layer
8:      $H[i] \leftarrow$  ADDLAYER( $H[i-1], 2^i\hat{w}, 2^i\hat{s}, n, \hat{r}$ )
9:  end for
10:  return  $H$ 
11: end function

12: function ADDLAYER( $MOD_{\hat{s}}[A_1, A_2, \dots, A_r], s, w, n, \hat{r}$ )
13:    $MOD_s \leftarrow$  list of size  $\hat{r}$  ▷ Initialize current layer
14:    $m \leftarrow \frac{w}{s}$  ▷ Update expected sketch size for current layer
15:   for  $i \leftarrow 0$  to  $\hat{r}$  do ▷ Retrieve modimizers from matching intervals within the previous layer
16:      $MOD_s[i] =$  GETMODIMIZERS( $(MOD_{\hat{s}}[A_{2i}] \cup MOD_{\hat{s}}[A_{2i+1}]), s, m$ )
17:  end for
18:  return  $MOD_s$ 
19: end function

```

---

## References

**chr14:  
2,000,000-3,600,000**

% Identity Estimate

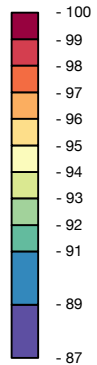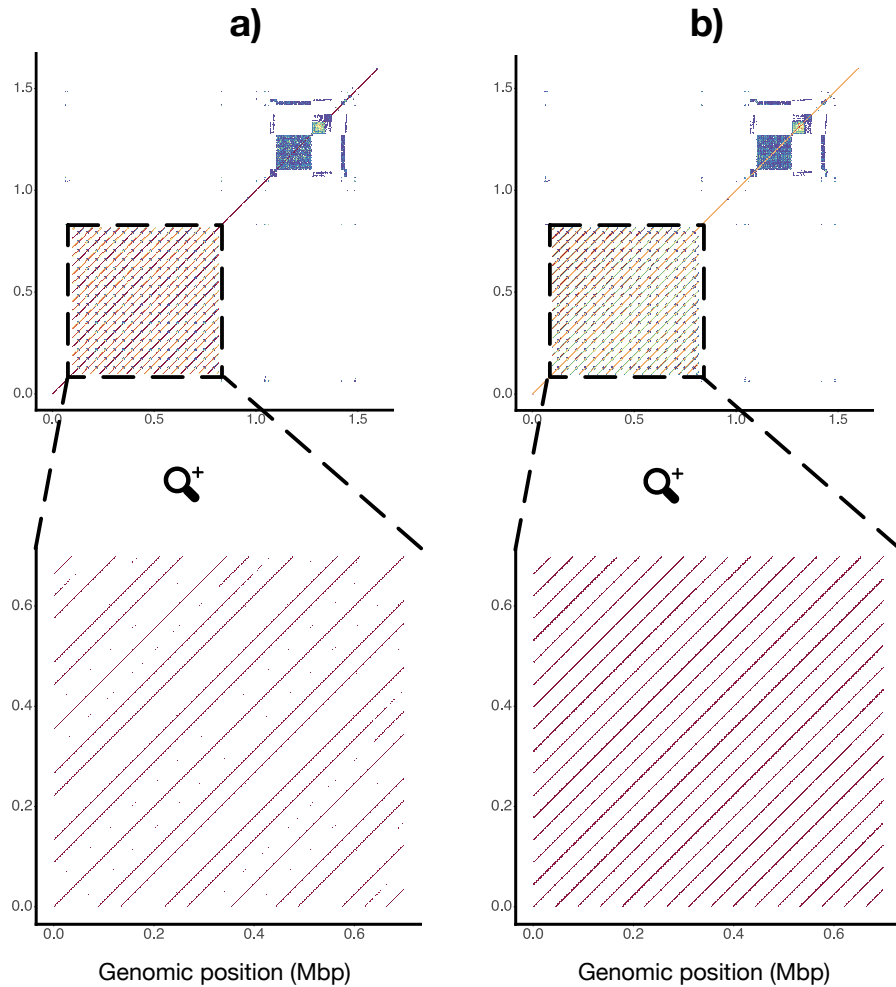

**chr14:  
2,100,000-2,800,000**

% Identity Estimate

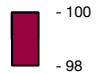

**Supplementary Figure 1.** Screenshots of ModDotPlot run on a human acrocentric short arm (CHM13 chr14:2,000,000-3,600,000), highlighting the rDNA array with and without ModDotPlot's interval extension activated. **a)** With no interval extension, the full 16 copy rDNA array is visible; however, when zoomed in (chr14:2,100,000-2,800,000) and filtered for >98% sequence identity, some rDNA copies disappear from the plot due to registration artifacts. **b)** With intervals extended (i.e. when computing similarity for the cell  $M(A,B)$ , interval B is extended by  $w/2$  in both directions), all rDNA copies appear at all zoom levels.

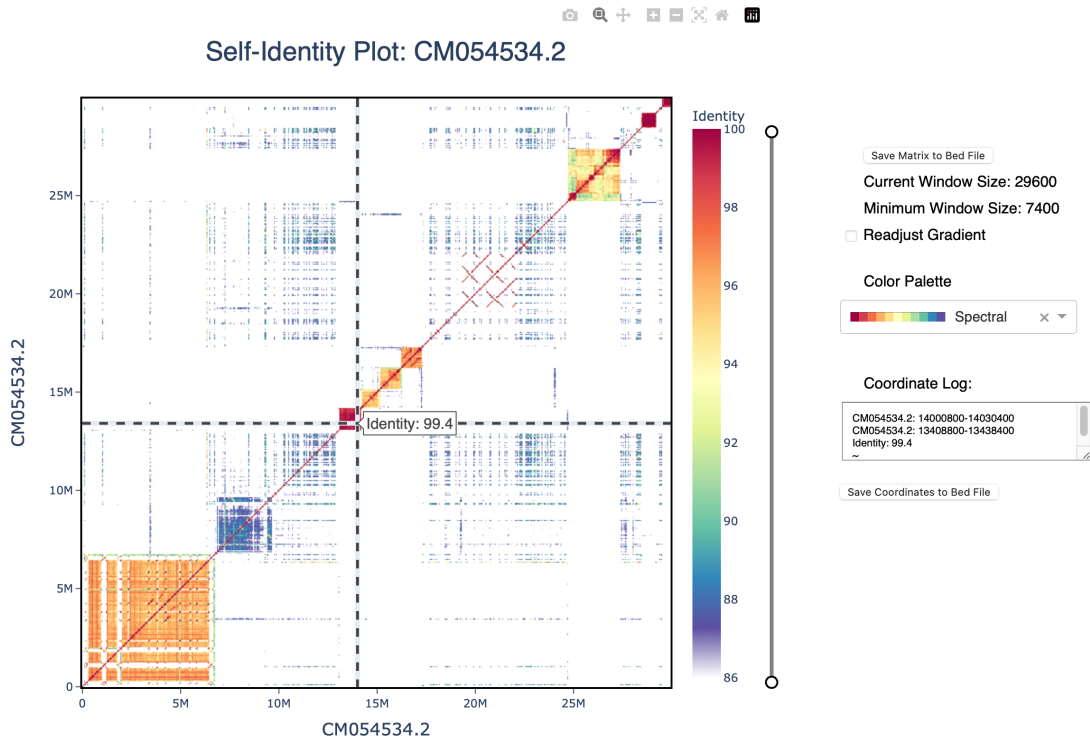

**Supplementary Figure 2.** Screenshot of ModDotPlot's interactive mode, showcasing the entire Y chromosome of a gibbon (mSym-Syn1, Makova *et. al* 2024)). Despite spanning almost 30 Mbp, ModDotPlot was able to create 3 matrices in under 2 minutes, with around 2.5GB of memory. Screenshot was taken using ModDotPlot version v0.8.0 (git commit `ed190c7`).

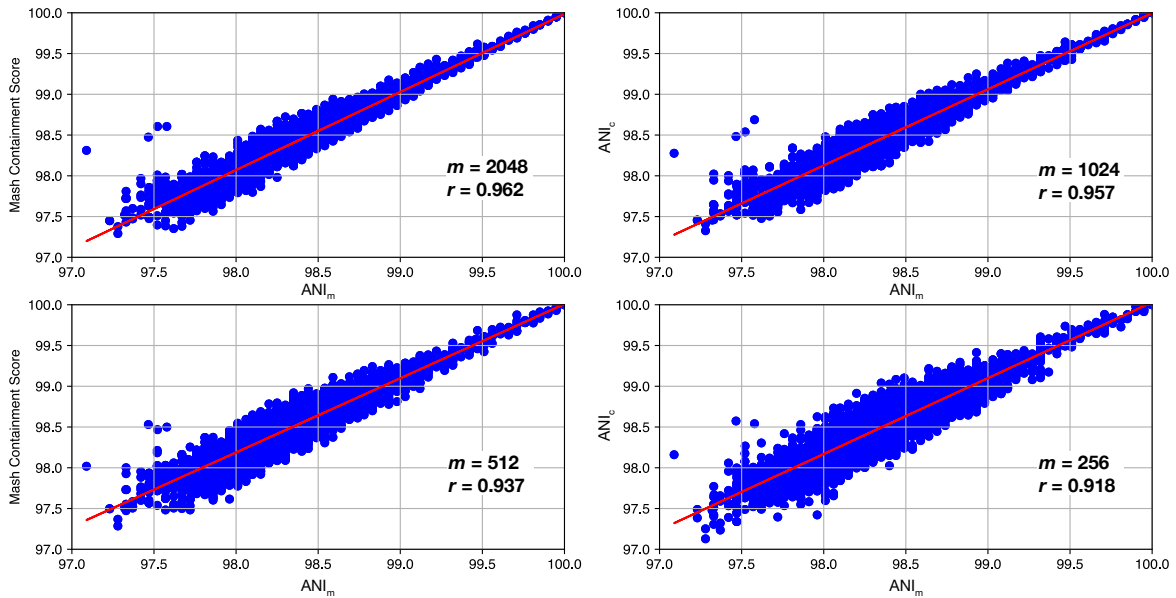

**Supplementary Figure 3.** Scatterplot of  $ANI_m$  against the  $ANI_c$  distances under various sketch sizes. The 10-mer non-canonical HOR region from Figure 4 was excluded from analysis.
